# Supplementary material for: Stress regulation via surface micro-etching and reconstruction for enhancing triple-cation perovskite solar cells with an efficiency of 25.54%
Source: Royal Society of Chemistry journal article supplement (doi:10.1039/d4ee04248d), 2024-01-01
Supplement: d4ee04248d1.pdf [file d4ee04248d1.pdf]

**Stress Regulation via Surface Micro-etching and Reconstruction for Enhancing Triple-Cation Perovskite Solar Cells with the Efficiency of 25.54%**

Yang Ding,<sup>1,2</sup> Erming Feng,<sup>1,2</sup> Siyuan Lu,<sup>1,2</sup> Jianhui Chang,<sup>1,2</sup> Caoyu Long,<sup>1,2</sup> Sichao Tong,<sup>3</sup> Hengyue Li,<sup>1,2</sup> Junliang Yang<sup>1,2,4,\*</sup>

<sup>1</sup> Hunan Key Laboratory for Super-microstructure and Ultrafast Process, School of Physics, Central South University, Changsha, 410083, China

<sup>2</sup> Hunan Key Laboratory of Nanophotonics and Devices, School of Physics, Central South University, Changsha, China

<sup>3</sup> Hunan Nanoup Electronics Technology Co., LTD, Changsha, China

<sup>4</sup> State Key Laboratory of Powder Metallurgy, Central South University, Changsha, Hunan 410083, China

\* Corresponding authors: [junliang.yang@csu.edu.cn](mailto:junliang.yang@csu.edu.cn), +86-731-88660256 (J. Yang)

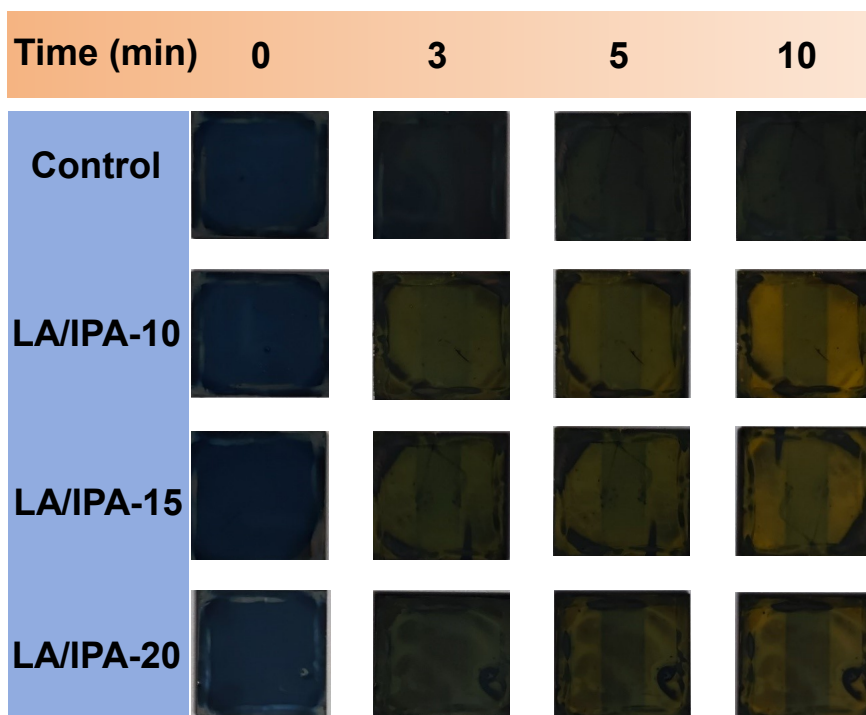

**Figure S1.** The state change of perovskite films soaked in mixed solution with the different LA/IPA ratio for 10 minutes.

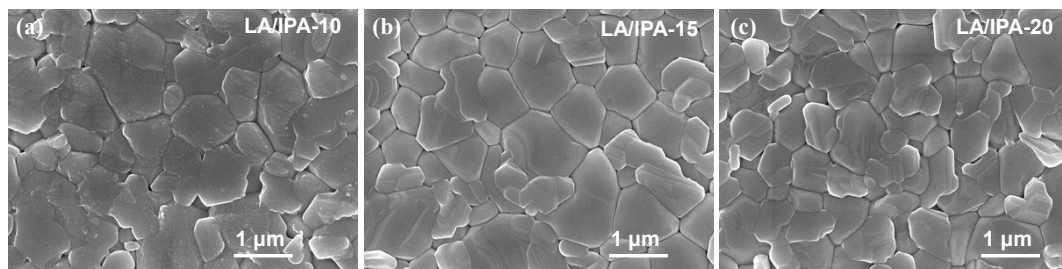

**Figure S2.** Surface SEM images of perovskite films etched by mixed solutions with the different LA/IPA ratios of a) 1:10, b) 1:15 and c) 1:20.

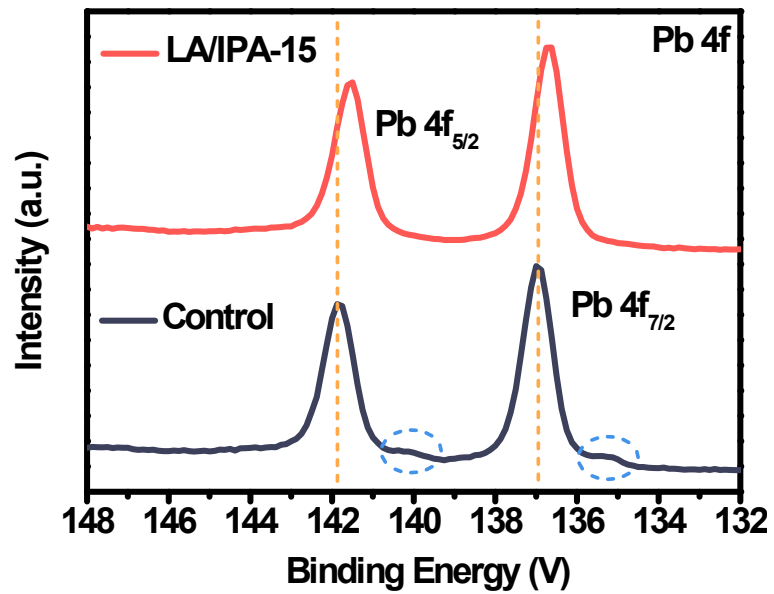

**Figure S3.** The XPS spectra of Pb 4f for control and LA/IPA-15 treated perovskite films.

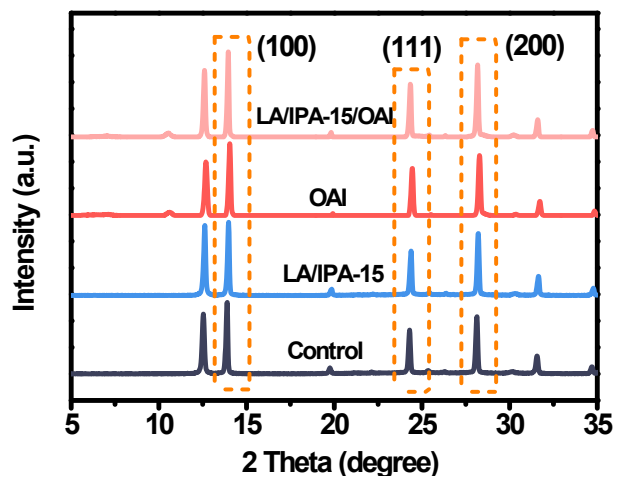

**Figure S4.** XRD pattern of control, LA/IPA-15, OAI and LA/IPA-15/OAI treated perovskite films.

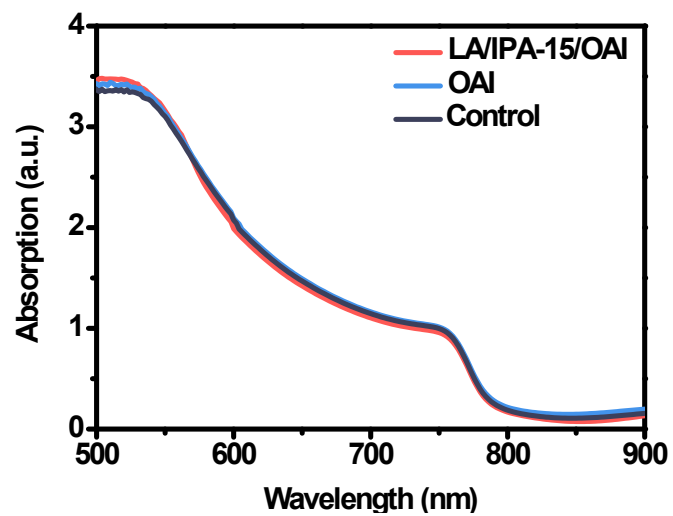

**Figure S5.** UV-vis light absorption spectrum of different perovskite films.

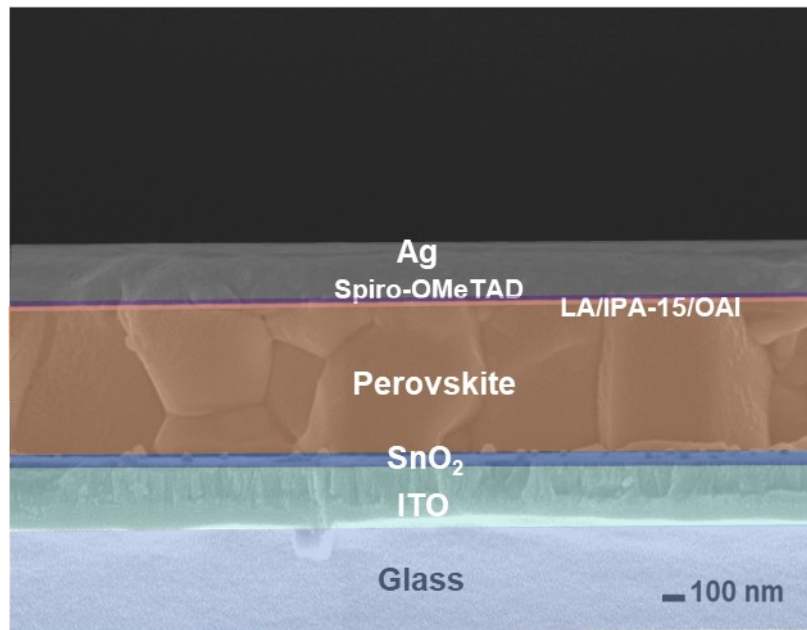

**Figure S6.** Cross-section SEM images of the LA/IPA-15/OAI treated device.

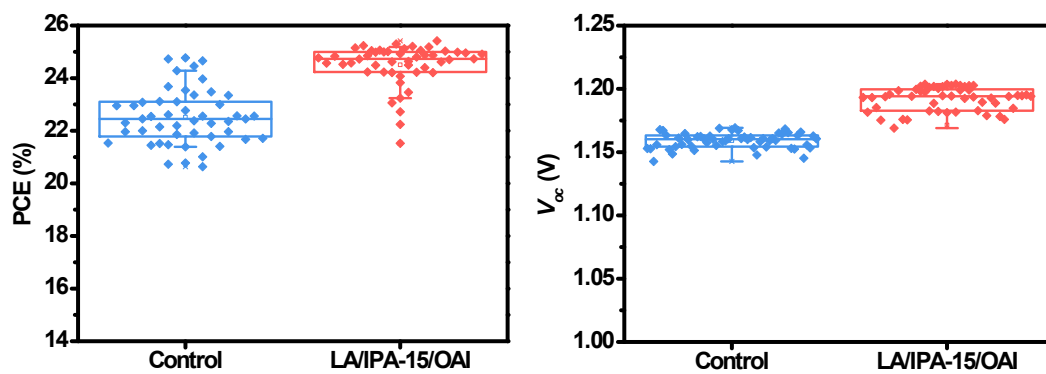

**Figure S7.** Statistical diagram of PCE and  $V_{oc}$  for the control and LA/IPA-15/OAI treated PSCs.



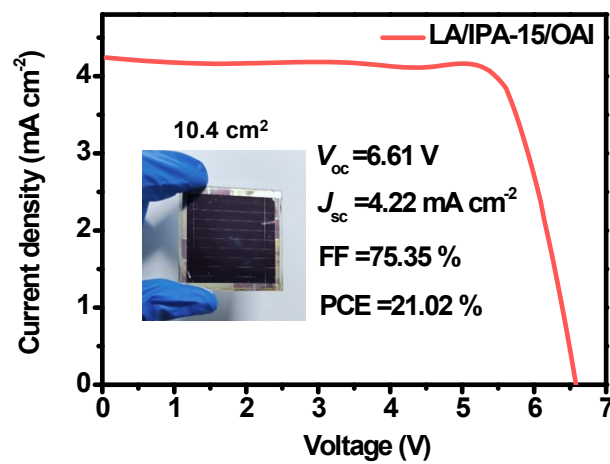

**Figure S8.**  $J$ - $V$  curve of LA/IPA-15/OAI treated PSC mini-module with an area of 10.4  $\text{cm}^2$ .

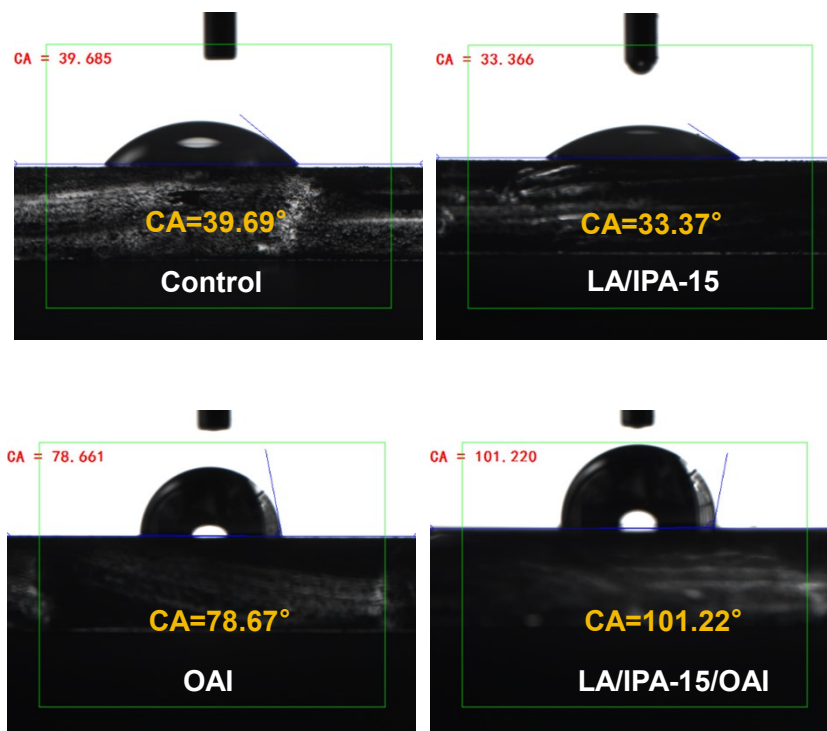

**Figure S9.** Water contact angle (CA) of perovskite films with different treatments.

**Table S1.** The fitting parameters of TRPL spectra for the control and target samples.

| Samples       | $A_1$ | $\tau_1$ (ns) | $A_2$ | $\tau_2$ (ns) | $\tau_{ave}$ (ns) |
|---------------|-------|---------------|-------|---------------|-------------------|
| Control       | 1.04  | 21.90         | 0.16  | 127.04        | 77.47             |
| LA/IPA-15/OAI | 0.34  | 58.84         | 0.27  | 359.90        | 308.52            |

**Table S2.** The fitting data of EIS for the control and target devices.

| Samples       | $R_s (\Omega)$ | $R_{tran} (\Omega)$ | $R_{rec} (\Omega)$ |
|---------------|----------------|---------------------|--------------------|
| Control       | 68             | 4390                | 11425              |
| LA/IPA-15/OAI | 34             | 2141                | 21587              |

**Table S3.** Photovoltaic performance statistics of representative triple-cation PSCs during the past three years.

| Perovskite component                                                                                                 | $V_{oc}$ (V) | $J_{sc}$ (mA cm <sup>-2</sup> ) | FF (%)       | PCE (%)      | Year        | Ref.             |
|----------------------------------------------------------------------------------------------------------------------|--------------|---------------------------------|--------------|--------------|-------------|------------------|
| $\text{Cs}_{0.05}(\text{FA}_{0.98}\text{MA}_{0.02})_{0.95}\text{Pb}(\text{I}_{0.98}\text{Br}_{0.02})_3$              | 1.17         | 24.85                           | 81.33        | 23.68        | 2022        | [S1]             |
| $(\text{CsPbI}_3)_{0.05}[(\text{FAPbI}_3)_{0.97}(\text{MAPbBr}_3)_{0.03}]_{0.9}$                                     | 1.21         | 25.21                           | 80.12        | 24.43        | 2022        | [S2]             |
| $(\text{Cs}_{0.05}\text{FA}_{0.95}\text{PbI}_3)_{0.975}(\text{MAPbBr}_3)_{0.025}$                                    | 1.18         | 25.58                           | 82.11        | 24.78        | 2023        | [S3]             |
| $\text{Cs}_{0.07}\text{FA}_{0.9}\text{MA}_{0.03}\text{Pb}(\text{I}_{0.92}\text{Br}_{0.08})_3$                        | 1.20         | 24.50                           | 81.80        | 24.20        | 2023        | [S4]             |
| $(\text{Cs}_{0.05}\text{FA}_{0.75}\text{MA}_{0.20})\text{Pb}(\text{I}_{0.96}\text{Br}_{0.04})_3$                     | 1.20         | 25.58                           | 82.68        | 25.43        | 2023        | [S5]             |
| $\text{Cs}_{0.03}\text{FA}_{0.945}\text{MA}_{0.025}\text{Pb}(\text{I}_{0.975}\text{Br}_{0.025})_3$                   | 1.16         | 25.07                           | 84.88        | 24.74        | 2024        | [S6]             |
| $\text{Cs}_{0.07}\text{FA}_{0.9}\text{MA}_{0.03}\text{Pb}(\text{I}_{0.975}\text{Br}_{0.025})_3$                      | 1.20         | 25.25                           | 82.99        | 25.04        | 2024        | [S7]             |
| <b><math>\text{Cs}_{0.03}\text{FA}_{0.945}\text{MA}_{0.025}\text{Pb}(\text{I}_{0.975}\text{Br}_{0.025})_3</math></b> | <b>1.20</b>  | <b>25.40</b>                    | <b>83.79</b> | <b>25.54</b> | <b>2024</b> | <b>This work</b> |

- [S1] S. You, H. Zeng, Z. Ku, X. Wang, Z. Wang, Y. Rong, Y. Zhao, X. Zheng, L. Luo, L. Li, S. Zhang, M. Li, X. Gao, X. Li, *Adv. Mater.* **2020**, 32, 2003990.
- [S2] J.-H. Kim, Y. R. Kim, J. Kim, C.-M. Oh, I.-W. Hwang, J. Kim, S. Zeiske, T. Ki, S. Kwon, H. Kim, A. Armin, H. Suh, K. Lee, *Adv. Mater.* **2022**, 34, 2205268.
- [S3] X. Wang, D. Liu, R. Liu, X. Du, B. Zhang, X. Sun, C. Chen, Z. Li, Q. Zhao, Z. Shao, X. Wang, G. Cui, S. Pang, *Adv. Energy Mater.* **2023**, 2203635.
- [S4] J. Deng, K. Wei, L. Yang, L. Lin, Y. Xiao, X. Cai, C. Zhang, D. Wu, X. Zhang, J. Zhang, *Adv. Mater.* **2023**, 35, 2300233.
- [S5] L. Shen, P. Song, L. Zheng, L. Wang, X. Zhang, K. Liu, Y. Liang, W. Tian, Y. Luo, J. Qiu, C. Tian, L. Xie, Z. Wei, *Adv. Mater.* **2023**, 35, 2301624.
- [S6] Y. Ding, X. Feng, E. Feng, J. Chang, H. Li, C. Long, Y. Gao, S. Lu, J. Yang, *Small* **2024**, 2308836.
- [S7] D. Liu, C. Chen, X. Wang, X. Sun, B. Zhang, Q. Zhao, Z. Li, Z. Shao, X. Wang, G. Cui, S. Pang, *Adv. Mater.* **2024**, 36, 2310962.
